# Supplementary material for: Using wavelet transform to analyse on-road mobile measurements of air pollutants: a case study to evaluate vehicle emission control policies during the 2014 APEC summit
Source: Copernicus journal article supplement (doi:10.5194/acp-2019-310), 2019-05-15
Supplement: Supplementary file 1 [file acp-2019-310-supplement.pdf]

# Using wavelet transform to analyse on-road mobile measurements of air pollutants: a case study to evaluate vehicle emission control policies during the 2014 APEC summit

5 Yingruo Li<sup>1, 2#</sup>, Ziqiang Tan<sup>1#</sup>, Chunxiang Ye<sup>1</sup>, Junxia Wang<sup>1</sup>, Yanwen Wang<sup>1</sup>, Yi Zhu<sup>1</sup>, Pengfei Liang<sup>1</sup>,  
Xi Chen<sup>1</sup>, Yanhua Fang<sup>1</sup>, Yiqun Han<sup>1</sup>, Qi Wang<sup>1</sup>, Di He<sup>3</sup>, Yao Wang<sup>3</sup>, and Tong Zhu<sup>1\*</sup>

<sup>1</sup>BIC-ESAT and SKL-ESPC, College of Environmental Sciences and Engineering, Peking University, Beijing 100871, China

<sup>2</sup>Institute of Urban Meteorology, China Meteorological Administration, Beijing, 100089, China

<sup>3</sup>Environmental Meteorology Forecast Center of Beijing-Tianjin-Hebei, China Meteorological Administration, Beijing, 100089, China

10 <sup>#</sup>These authors contributed equally to the paper.

\*Correspondence to: tzhu@pku.edu.cn

# Supplement

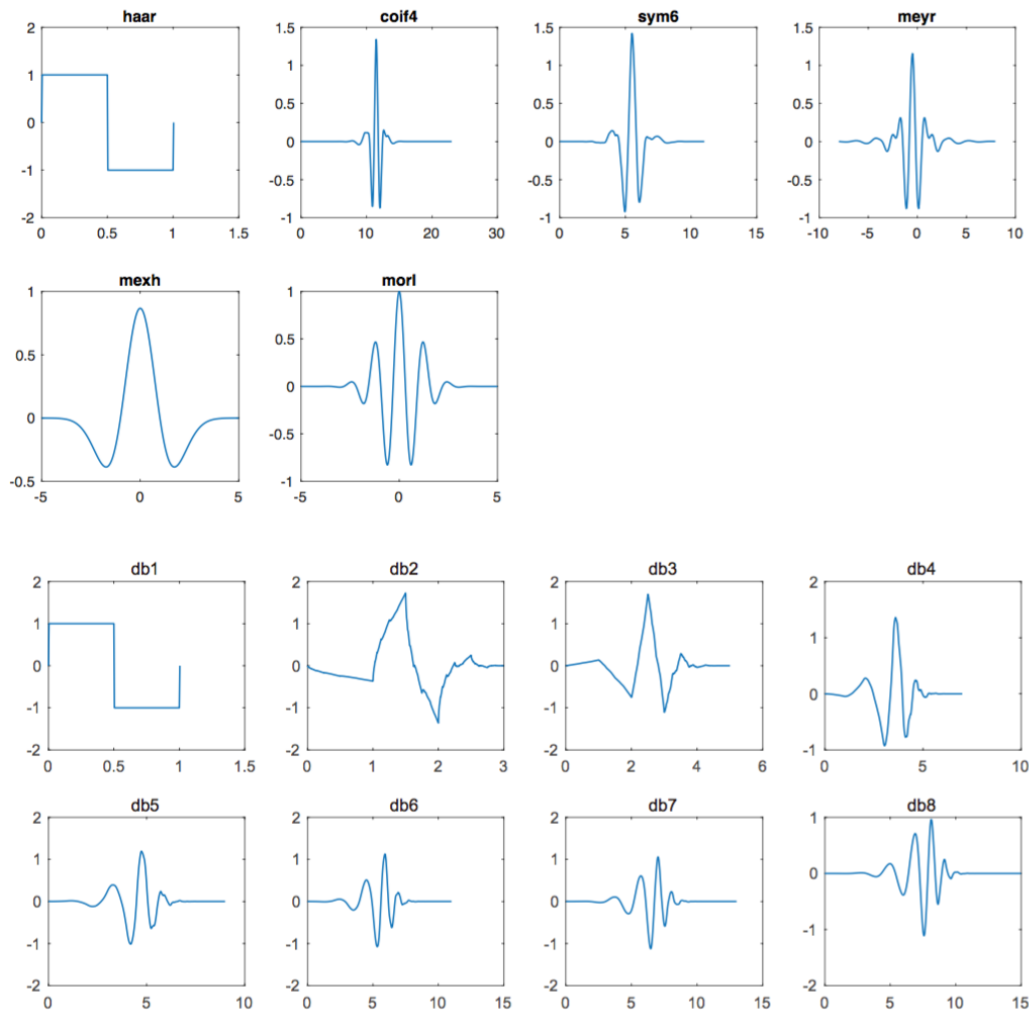

**Figure S1.** The commonly used mother wavelet functions and the “dbN” family wavelet functions used in this study.

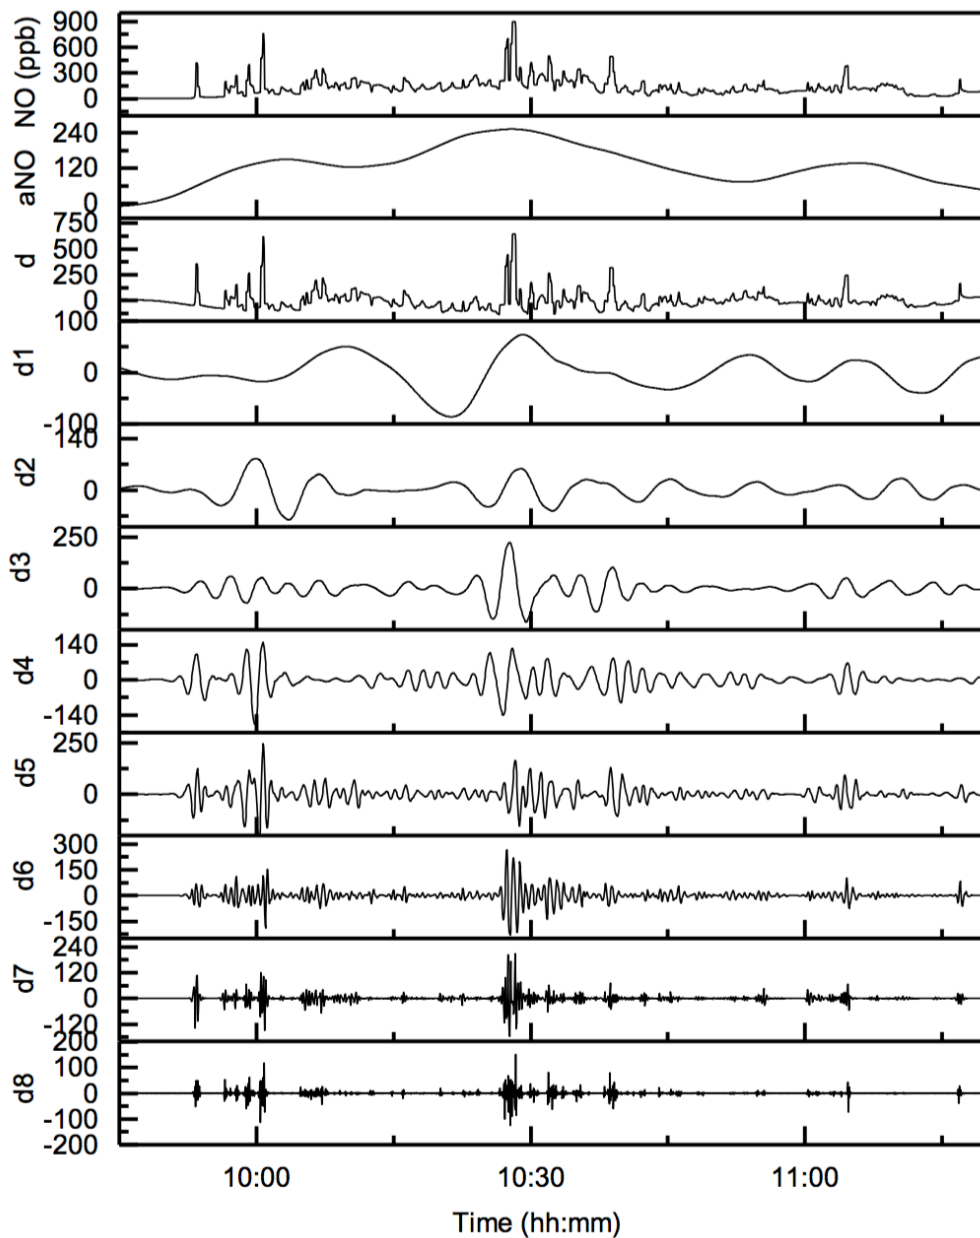

**Figure S2.** The original decomposition results of the WTM using db6 and eight decomposition levels for 6 November 2014. NO is the on-road mobile measurement concentration, aNO is the decomposed signal representing the trend in the background, and  $d$  ( $= d1 + d2 + \dots + d8$ ) is the decomposed signal representing trends in vehicle emissions.  $d1$ – $d8$  are the decomposed signals representing variations at different frequencies.

5

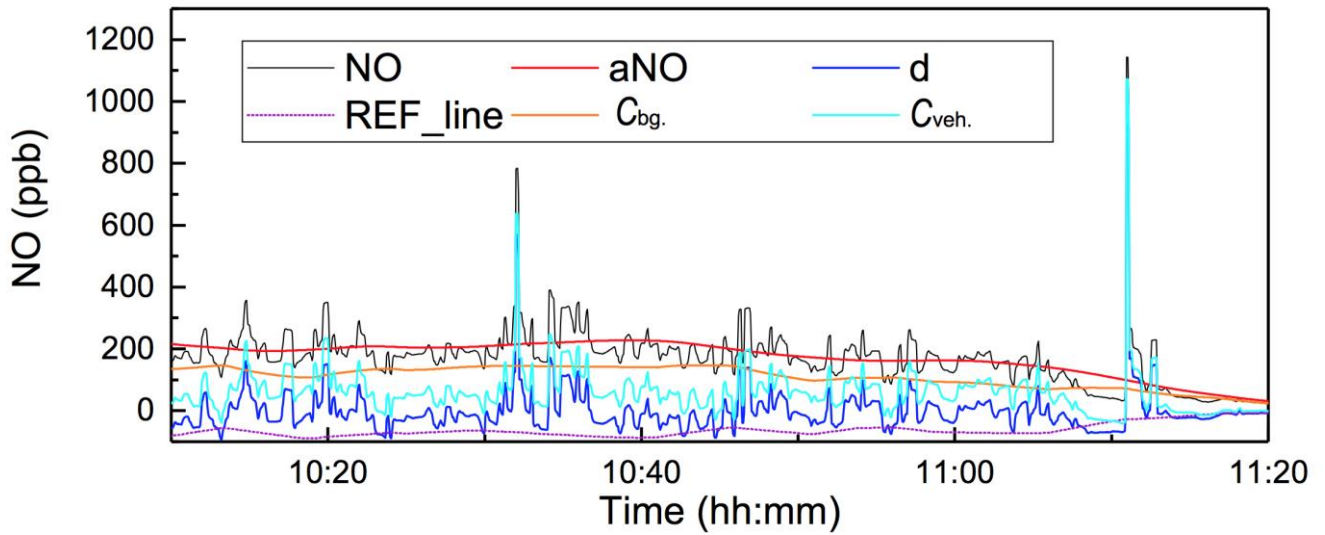

5 **Figure S3.** Moving the decomposed result of the WTM by taking REF\_line as the reference line (example data from 8 November 2014). The black line represents the original measured on-road NO concentrations, the red line represents original high-frequency concentrations decomposed by the WTM, and the blue line represents original low-frequency concentrations decomposed by the WTM. The purple dotted line represents a moving reference line, which is a 5 min moving minimum of line “d”. The orange line represents  $C_{bg.}$  and was obtained by adding “aNO” to “REF\_line”, and the cyan line represents  $C_{veh.}$  and was obtained by subtracting “REF\_line” from “d”. The principle of the selection of the REF\_line is to keep the original shape of “aNO” and “d” but avoid negative values as much as possible.

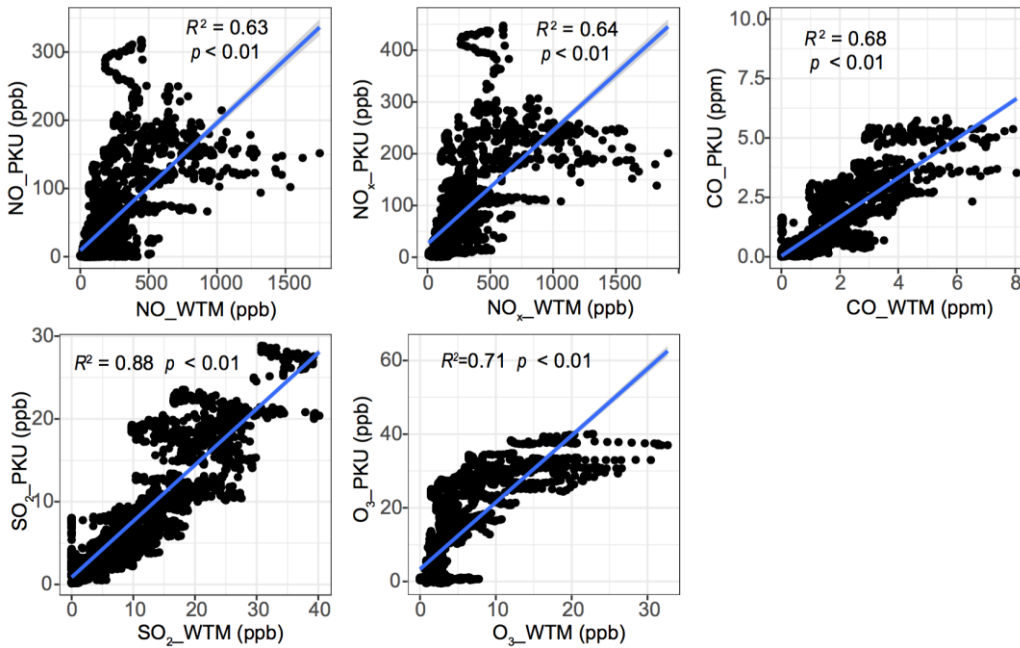

10 **Figure S4.** Correlations between the on-road background concentrations obtained by the wavelet transform method (WTM) and observations at the PKU site for NO, NO<sub>x</sub>, BC, CO, SO<sub>2</sub>, and O<sub>3</sub>.

**Table S1.** Timing of on-road measurements made around the 4th Ring Road of Beijing.

| Date<br>(MM/DD_Night, Day) | Start time <sup>a</sup><br>(hh:mm) | End time <sup>b</sup><br>(hh:mm) | Driving duration <sup>c</sup><br>(h) |
|----------------------------|------------------------------------|----------------------------------|--------------------------------------|
| 10/28_Day                  | 10:17                              | 11:55                            | 1.63                                 |
| 10/29_Day                  | 09:52                              | 11:20                            | 1.47                                 |
| 10/30_Day                  | 20:06                              | 21:13                            | 1.12                                 |
| 10/31_Day                  | 10:09                              | 11:28                            | 1.32                                 |
| 11/01_Day                  | 09:53                              | 11:18                            | 1.42                                 |
| 11/02_Day                  | 09:56                              | 11:24                            | 1.46                                 |
| 11/03_Day                  | 10:05                              | 11:17                            | 1.20                                 |
| 11/04_Night                | 00:58                              | 02:06                            | 1.13                                 |
| 11/04_Day                  | 09:56                              | 11:29                            | 1.55                                 |
| 11/05_Night                | 00:58                              | 02:12                            | 1.23                                 |
| 11/05_Day                  | 09:56                              | 11:10                            | 1.23                                 |
| 11/06_Night                | 01:10                              | 02:22                            | 1.20                                 |
| 11/06_Day                  | 09:58                              | 11:10                            | 1.20                                 |
| 11/07_Night                | 01:04                              | 02:05                            | 1.02                                 |
| 11/07_Day                  | 09:58                              | 11:08                            | 1.17                                 |
| 11/08_Night                | 00:56                              | 02:05                            | 1.15                                 |
| 11/08_Day                  | 09:58                              | 11:12                            | 1.23                                 |
| 11/09_Night                | 00:58                              | 02:07                            | 1.15                                 |
| 11/09_Day                  | 09:58                              | 11:07                            | 1.15                                 |
| 11/10_Night                | 00:59                              | 02:07                            | 1.13                                 |
| 11/10_Day                  | 09:59                              | 11:08                            | 1.15                                 |
| 11/11_Night                | 00:59                              | 2:09                             | 1.17                                 |
| 11/11_Day                  | 10:01                              | 11:12                            | 1.18                                 |
| 11/12_Night                | 00:59                              | 02:11                            | 1.20                                 |
| 11/12_Day                  | 09:58                              | 11:06                            | 1.13                                 |
| 11/13_Night                | 00:58                              | 02:08                            | 1.17                                 |
| 11/13_Day                  | 09:57                              | 11:18                            | 1.35                                 |
| 11/14_Night                | 00:58                              | 02:08                            | 1.17                                 |
| 11/14_Day                  | 09:57                              | 11:45                            | 1.80                                 |
| 11/15_Night                | 00:58                              | 02:08                            | 1.17                                 |
| 11/15_Day                  | 10:00                              | 11:28                            | 1.47                                 |
| 11/16_Night                | 00:58                              | 02:10                            | 1.20                                 |
| 11/16_Day                  | 10:02                              | 11:19                            | 1.28                                 |
| 11/17_Night                | 00:58                              | 02:08                            | 1.17                                 |
| 11/17_Day                  | 09:57                              | 11:29                            | 1.53                                 |
| 11/18_Night                | 00:59                              | 02:08                            | 1.15                                 |
| 11/18_Day                  | 10:03                              | 12:03                            | 2.00                                 |
| 11/19_Night                | 00:58                              | 02:06                            | 1.13                                 |
| 11/19_Day                  | 09:57                              | 011:16                           | 1.32                                 |

|             |       |       |      |
|-------------|-------|-------|------|
| 11/20_Night | 00:59 | 02:09 | 1.17 |
| 11/20_Day   | 09:57 | 11:38 | 1.68 |
| 11/21_Night | 00:58 | 02:10 | 1.2  |
| 11/21_Day   | 10:02 | 11:59 | 1.95 |
| 11/22_Night | 00:58 | 02:06 | 1.13 |

---

<sup>a</sup>Start-time is when the monitoring vehicle entered the 4th Ring Road.

<sup>b</sup>Start-time is when the monitoring vehicle left the 4th Ring Road.

<sup>c</sup>Driving duration is the length of time when the monitoring vehicle driving along the 4th Ring Road.
